# Supplementary material
Source: Springer Nature journal article supplement (https://www.springermedizin.de/resource/supplementary/12990_2010_375_MOESM4_ESM.pdf/9613138)

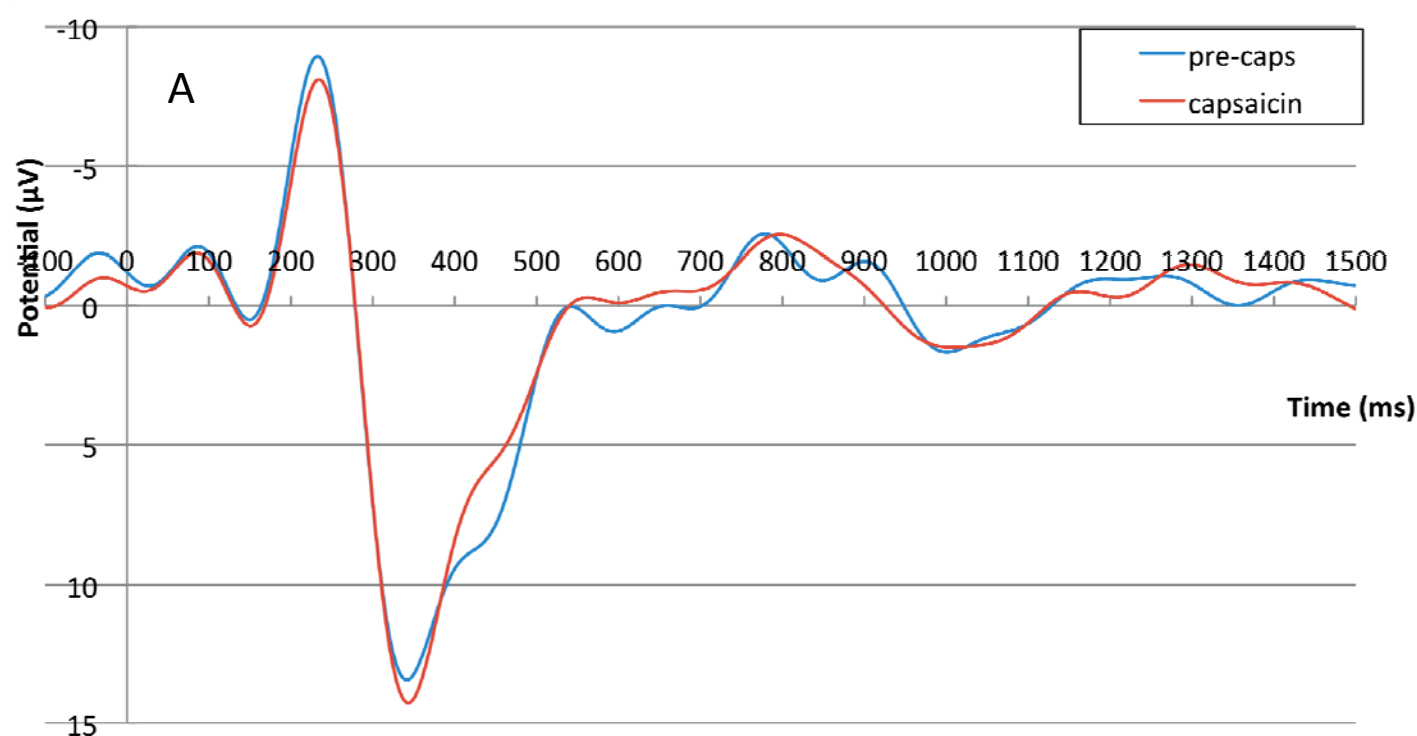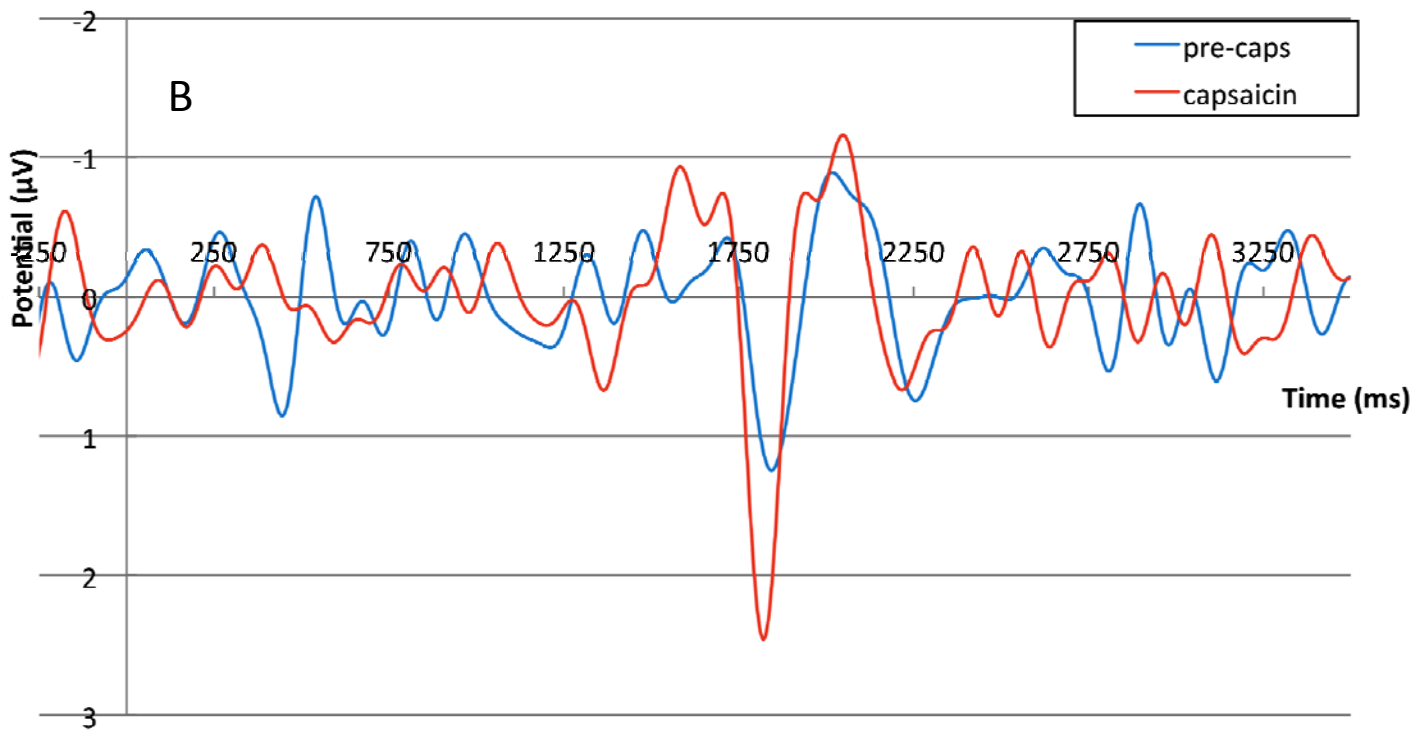

Supplement: MOESM4 [file 9613138]
